# Supplementary material for: Sinorhizobium meliloti Functions Required for Resistance to Antimicrobial NCR Peptides and Bacteroid Differentiation
Source: PubMed Central journal article supplement (PMC8406287; doi:10.1128/mbio.00895-21), 2021-07-27
Supplement: mbio.00895-21-sf002.pdf [file mbio.00895-21-sf002.pdf]

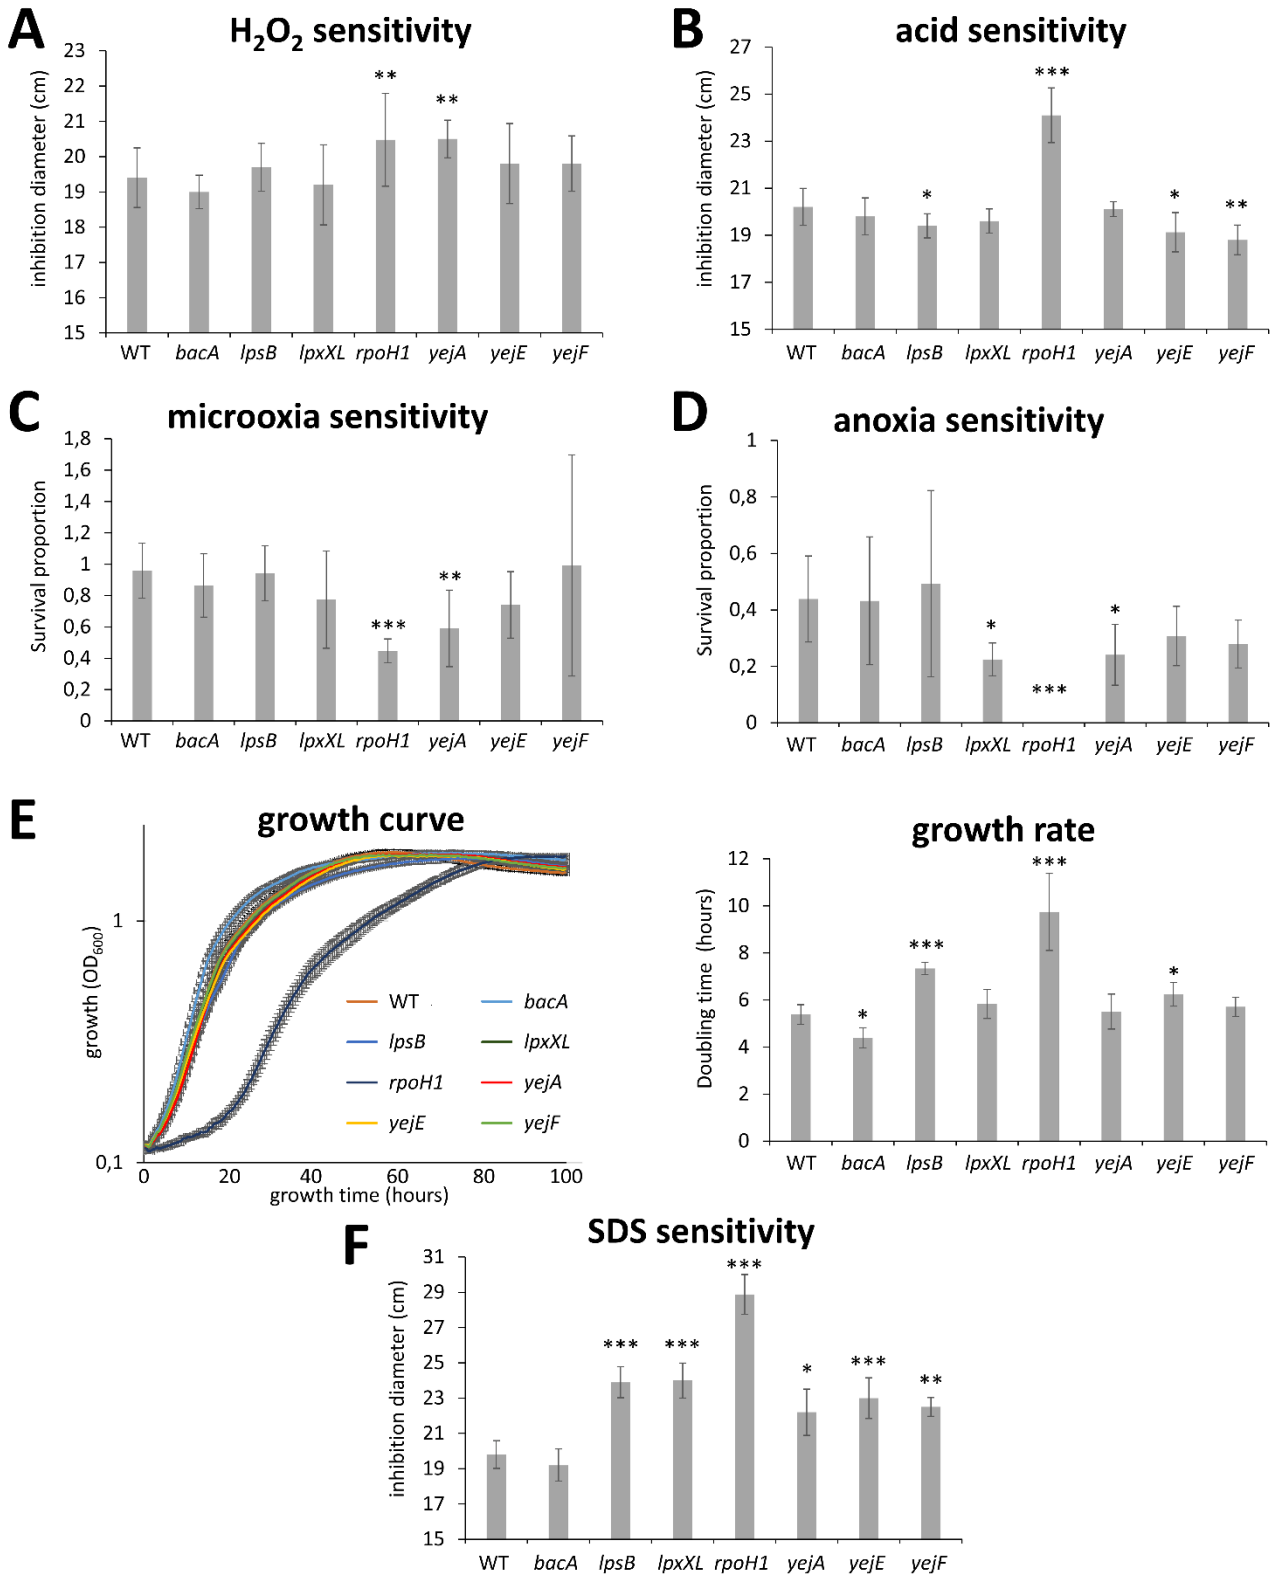

**Figure S2. Phenotypes of *Sinorhizobium meliloti* mutants in *in vitro* stress conditions.** **A.** Growth inhibition in the presence of H<sub>2</sub>O<sub>2</sub> (n=10). **B.** Growth inhibition in the presence of HCl (n=10). **C.** Growth inhibition in microoxia (n=4). **D.** Growth inhibition in anoxia (n=4). **E.** Growth curves and growth rate in liquid medium (n=10). **F.** Growth inhibition in the presence of SDS (n=10). Growth inhibition in (**A,B,F**) was determined by the size of a halo formed around a paper patch soaked in the stress compound and in (**C,D**) by colony forming units counting. Error bars in all panels are standard deviations. Nonparametric Kruskal-Wallis and post-hoc Dunn tests were used to assess the significance of differences in the data of panels A to F (\* is  $p < 0.05$ ; \*\* is  $p < 0.01$ ; \*\*\* is  $p < 0.001$ ). One representative experiment out of at least two is shown.
