# Supplementary material for: Sinorhizobium meliloti Functions Required for Resistance to Antimicrobial NCR Peptides and Bacteroid Differentiation
Source: PubMed Central journal article supplement (PMC8406287; doi:10.1128/mbio.00895-21), 2021-07-27
Supplement: mbio.00895-21-sf003.pdf [file mbio.00895-21-sf003.pdf]

**A**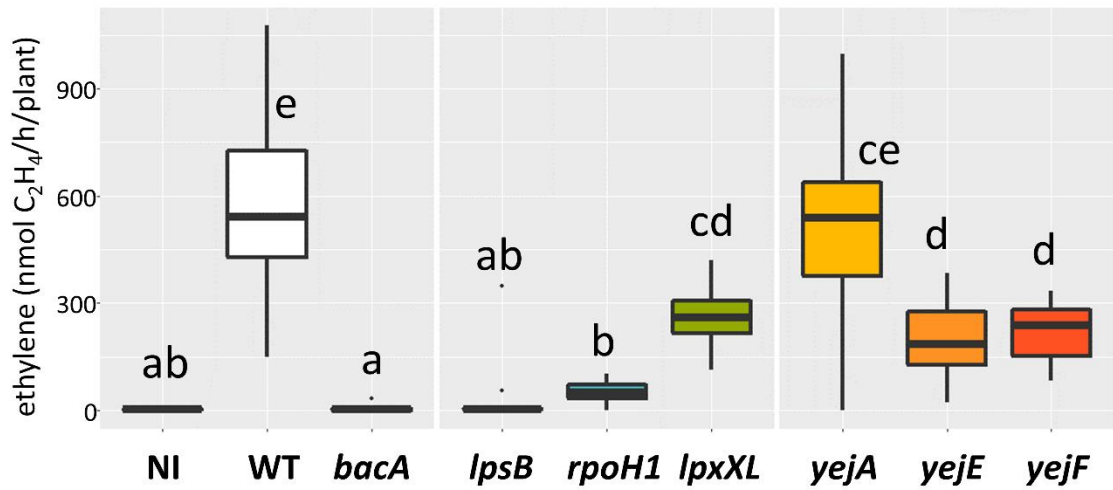**B**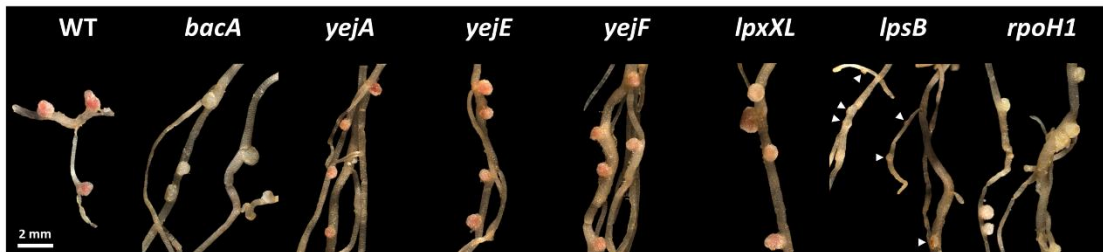

**Figure S3. Symbiotic phenotypes of *Sinorhizobium meliloti* NCR-sensitive mutants in *Medicago truncatula*.** **A.** Nitrogen fixation activity determined by the acetylene reduction assay on whole roots of nodulated plants infected with the indicated bacterial mutants at 21 days post inoculation. NI, non-inoculated control plants; WT, plants nodulated by the wild-type strain Sm1021. Boxplots were generated from 15 plants each. Letters associated with each condition represent statistically different classes determined by a non-parametric Dunn test, with a  $\alpha$  threshold equal to 0.05. **B.** Nodule phenotypes at 21 days post inoculation. Arrowheads indicate small nodules elicited by the *lpsB* mutant. Scale bar (2 mm) applies to all panels.
