# Supplementary material for: Sinorhizobium meliloti Functions Required for Resistance to Antimicrobial NCR Peptides and Bacteroid Differentiation
Source: PubMed Central journal article supplement (PMC8406287; doi:10.1128/mbio.00895-21), 2021-07-27
Supplement: mbio.00895-21-sf005.pdf [file mbio.00895-21-sf005.pdf]

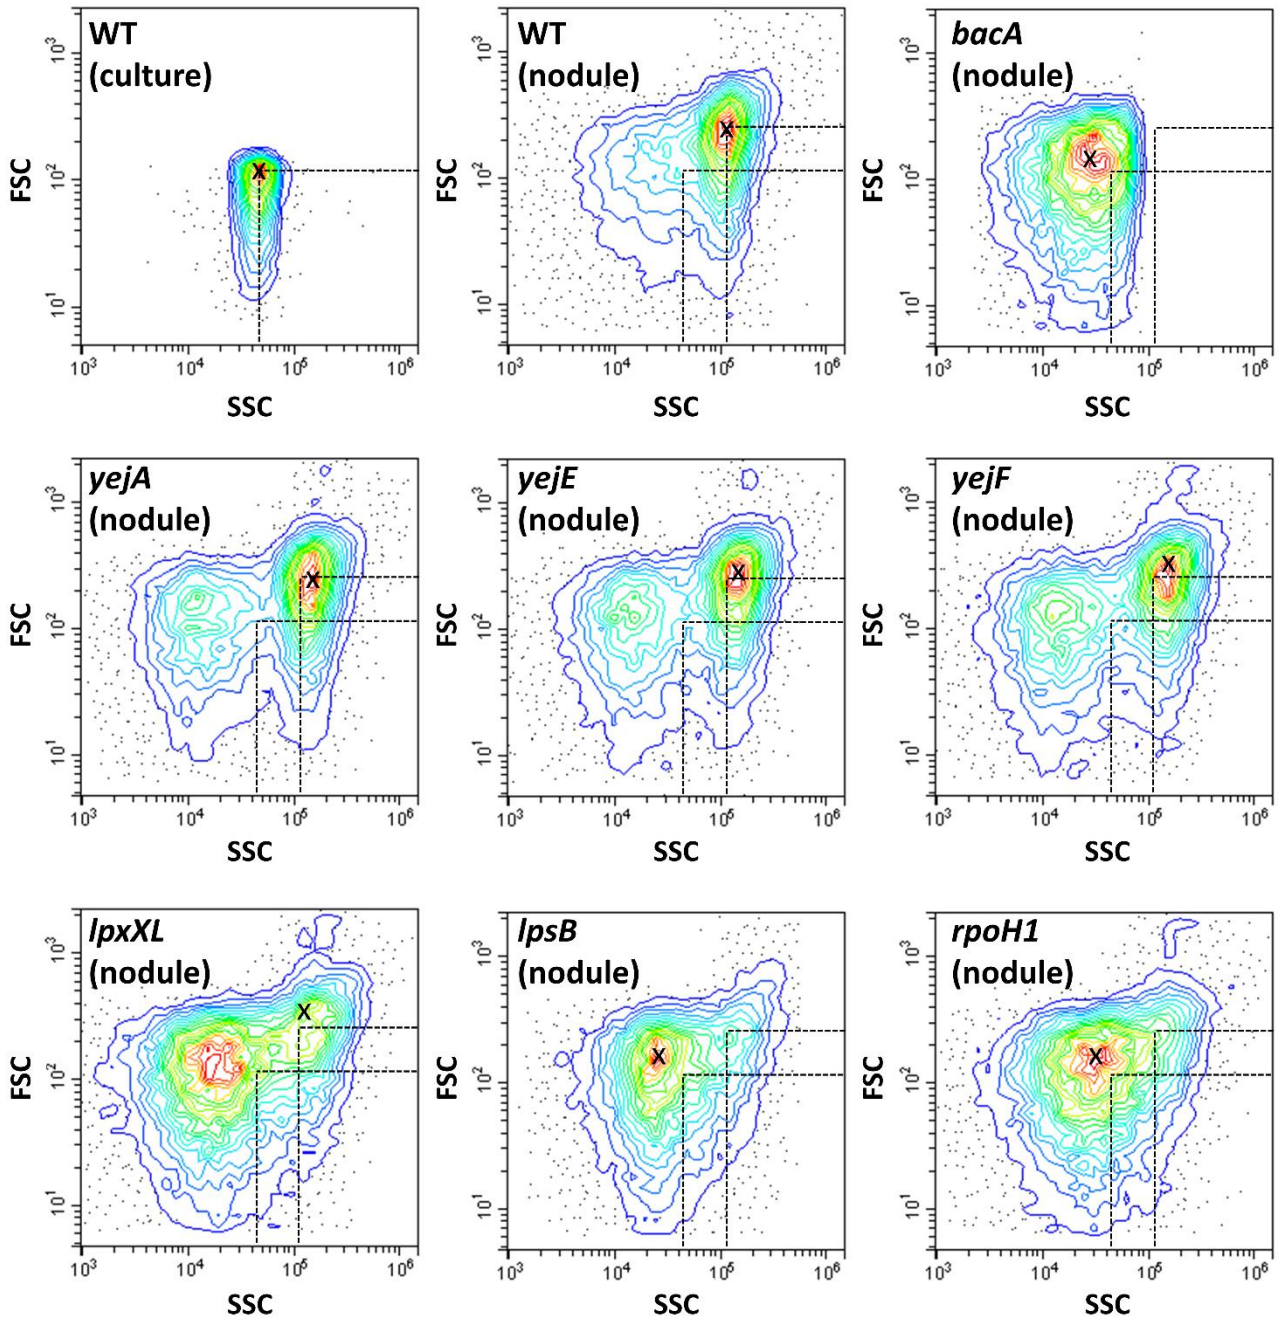

**Figure S5. Morphological parameters in nodule bacteria of *Medicago truncatula* nodules.** Flow cytometry analysis of the morphology of bacteria isolated from nodules infected with the indicated strains. The forward scatter (FSC, y-axes) is represented in function of the side scatter (SSC, x-axes). The "X" indicates the peak values for each sample. The position of the peak value in the cultured bacteria and in the wild-type bacteroids are indicated in each panel by the hatched lines.
