# Supplementary material for: Sinorhizobium meliloti Functions Required for Resistance to Antimicrobial NCR Peptides and Bacteroid Differentiation
Source: PubMed Central journal article supplement (PMC8406287; doi:10.1128/mbio.00895-21), 2021-07-27
Supplement: mbio.00895-21-sf007.pdf [file mbio.00895-21-sf007.pdf]

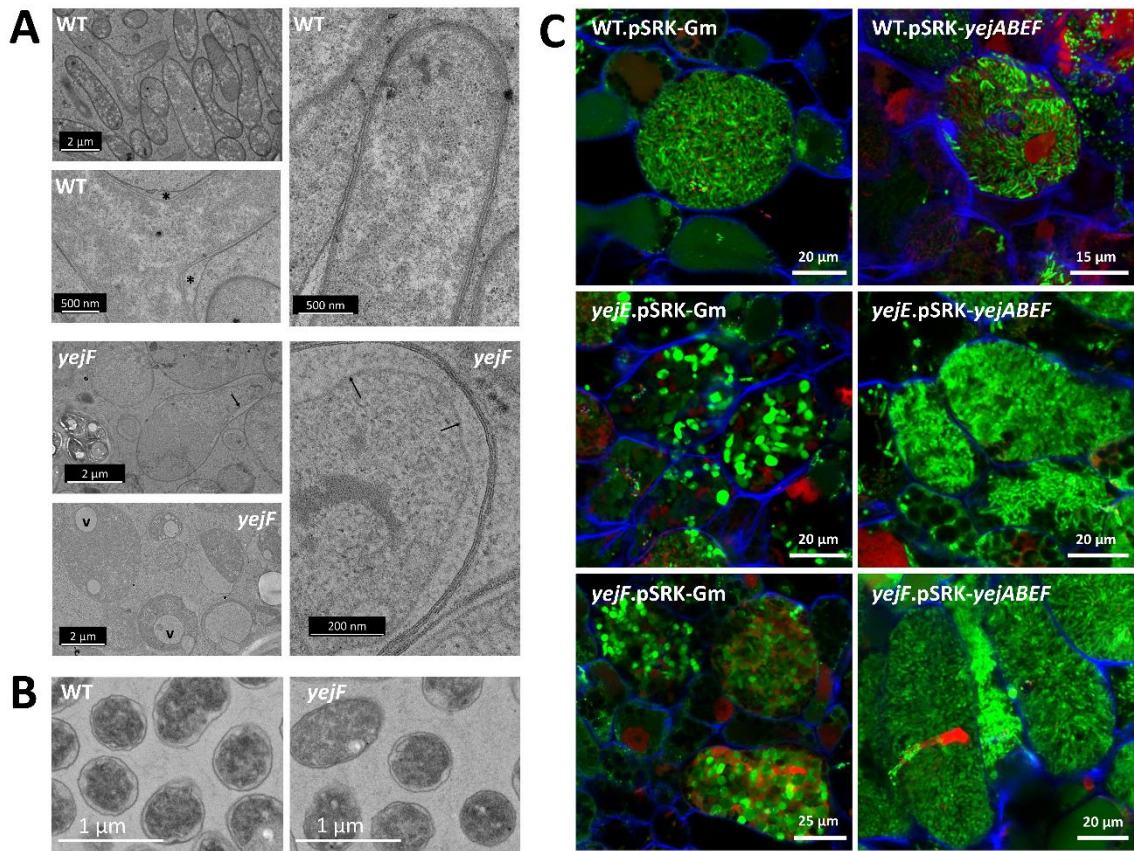

**Figure S7. Cellular defects in the *yejF* mutant bacteroids in *Medicago sativa* nodules.** **A.** Transmission electron microscopy of wild type (WT) and *yejF* mutant bacteroids. The arrows indicate retracted inner membranes in the *yejF* bacteroids, "v" indicate vacuoles and "\*" indicate an enlarged peribacteroid space found in the angle of a branched bacteroid. **B.** Ultrastructure of wild type (WT) and the *yejF* mutant bacteria in culture by transmission electron microscopy. Scale bars are 1  $\mu\text{m}$ . **C.** Confocal microscopy of sections of nodules infected with wild type (WT), *yejE* or *yejF* mutant bacteria carrying the empty plasmid pSRK-Gm or the complementing plasmid pSRK-*yejABEF*.
