# Supplementary material for: Sinorhizobium meliloti Functions Required for Resistance to Antimicrobial NCR Peptides and Bacteroid Differentiation
Source: PubMed Central journal article supplement (PMC8406287; doi:10.1128/mbio.00895-21), 2021-07-27
Supplement: mbio.00895-21-st001.pdf [file mbio.00895-21-st001.pdf]

**Table S1. Strains and primers used for mutant constructions.**

**STRAINS**

| <i>Escherichia coli</i> strains | Relevant characteristics                                                                                                                                                                | Source                                        |
|---------------------------------|-----------------------------------------------------------------------------------------------------------------------------------------------------------------------------------------|-----------------------------------------------|
| DH5 $\alpha$ .pVO155-pnpt2::GFP | Strain carrying the pVO155-pnpt2::GFP plasmid used for insertional mutagenesis                                                                                                          | 1                                             |
| DH5 $\alpha$ .pNPTS129          | Strain carrying the pNPTS129 plasmid used for the construction of deletion mutants                                                                                                      | 1                                             |
| DH5 $\alpha$ .pSRKGm            | Broad host-range expression vector derived from pBBR1                                                                                                                                   | 2                                             |
| DH5 $\alpha$ .pHC60-pnifH::GFP  | Strain used for triparental conjugation, carrying a derivative of the broad host range low copy number IncP plasmid pHC60 with a GFP gene under the control of the <i>nifH</i> promoter | R n  Geurts laboratory, Wageningen University |
| HB101.pRK600                    | Helper strain used for triparental conjugation                                                                                                                                          | common laboratory strain                      |

| <i>Sinorhizobium meliloti</i> strains  | Relevant characteristics                                                                 | Source                   |
|----------------------------------------|------------------------------------------------------------------------------------------|--------------------------|
| Sm1021                                 | <i>Sinorhizobium meliloti</i> wild type strain                                           | common laboratory strain |
| Sm1021. $\Delta$ bacA                  | Sm1021 derivative carrying a <i>bacA</i> deletion                                        | 3                        |
| Sm1021. <i>lpsB</i> ::Tn5              | Sm1021 derivative carrying a Tn5 transposon insertion in the <i>lpsB</i> gene            | 4                        |
| Sm1021. <i>lpxXL</i> ::pJH104          | Sm1021 derivative carrying a plasmid insertion in <i>lpxXL</i>                           | 5                        |
| Sm1021. <i>rpoH1</i> ::pVO155          | Sm1021 derivative carrying a pVO155-pnpt2::GFP in the <i>rpoH1</i> gene                  | this work                |
| Sm1021. <i>yejA</i> ::pVO155           | Sm1021 derivative carrying a pVO155-pnpt2::GFP in the <i>yejA</i> gene                   | this work                |
| Sm1021. <i>yejE</i> ::pVO155           | Sm1021 derivative carrying a pVO155-pnpt2::GFP in the <i>yejE</i> gene                   | this work                |
| Sm1021. <i>yejF</i> ::pVO155           | Sm1021 derivative carrying a pVO155-pnpt2::GFP in the <i>yejF</i> gene                   | this work                |
| Sm1021. $\Delta$ yejA                  | Sm1021 derivative carrying a <i>yejA</i> deletion                                        | this work                |
| Sm1021. $\Delta$ yejE                  | Sm1021 derivative carrying a <i>yejE</i> deletion                                        | this work                |
| Sm1021. $\Delta$ yejF                  | Sm1021 derivative carrying a <i>yejF</i> deletion                                        | this work                |
| Sm1021.pSRKGm                          | Sm1021 derivative carrying the empty pSRKGm plasmid                                      | this work                |
| Sm1021.pSRK-yejABEF                    | Sm1021 derivative carrying the <i>yejABEF</i> genes on the pSRKGm plasmid                | this work                |
| Sm1021. $\Delta$ yejE.pSRKGm           | Sm1021. $\Delta$ yejE derivative carrying the empty pSRKGm plasmid                       | this work                |
| Sm1021. $\Delta$ yejE.pSRK-yejABEF     | Sm1021. $\Delta$ yejE derivative carrying the <i>yejABEF</i> genes on the pSRKGm plasmid | this work                |
| Sm1021. $\Delta$ yejF.pSRKGm           | Sm1021. $\Delta$ yejF derivative carrying the empty pSRKGm plasmid                       | this work                |
| Sm1021. $\Delta$ yejF.pSRK-yejABEF     | Sm1021. $\Delta$ yejF derivative carrying the <i>yejABEF</i> genes on the pSRKGm plasmid | this work                |
| Sm1021.pHC60-pnifH::GFP                | Sm1021 carrying the pHC60-pnifH::GFP plasmid                                             | this work                |
| Sm1021. $\Delta$ bacA.pHC60-pnifH::GFP | Sm1021. $\Delta$ bacA carrying the pHC60-pnifH::GFP plasmid                              | this work                |
| Sm1021. $\Delta$ yejE.pHC60-pnifH::GFP | Sm1021. $\Delta$ yejE carrying the pHC60-pnifH::GFP plasmid                              | this work                |
| Sm1021. $\Delta$ yejF.pHC60-pnifH::GFP | Sm1021. $\Delta$ yejF carrying the pHC60-pnifH::GFP plasmid                              | this work                |

**PRIMERS**

| Targeted gene             | Primer name              | Sequence                         | Description                                                                      |                                                                                  |
|---------------------------|--------------------------|----------------------------------|----------------------------------------------------------------------------------|----------------------------------------------------------------------------------|
| Insertion mutants         | SMc02829 ( <i>yejF</i> ) | 2829forward                      | CAAATCGGTGTCGACCAACTCGATCCTGAAGCTC                                               | Primers used to amplify a region of SMc02829 CDS, flanked with Sall & XbaI sites |
|                           |                          | 2829reverse                      | GTTGGCTTAGACATGGCTATCATTAC                                                       |                                                                                  |
|                           |                          | 2829out-f                        | CATCTCCTTCGACATCAAG                                                              | Primers used for verification                                                    |
|                           |                          | 2829out-r                        | CTCGTCGGCGATCAGGAGCTC                                                            |                                                                                  |
|                           | SMc02830 ( <i>yejE</i> ) | 2830forward                      | CTTCGGCCTGTCGACGTTTGCCGAGTTCATC                                                  | Primers used to amplify a region of SMc02830 CDS, flanked with Sall & XbaI sites |
|                           |                          | 2830reverse                      | CAGCGCTCTAGAGAAAAGGACCCGAGATG                                                    |                                                                                  |
|                           |                          | 2830out-f                        | CTGGCTTCTCCTCCTCCTTC                                                             | Primers used for verification                                                    |
|                           |                          | 2830out-r                        | GATGATGAGCAGGATGTAGAG                                                            |                                                                                  |
|                           | SMc02832 ( <i>yejA</i> ) | 2832forward                      | GCTACGTCGACGATCGGAGAACCAATAC                                                     | Primers used to amplify a region of SMc02832 CDS, flanked with Sall & XbaI sites |
|                           |                          | 2832reverse                      | GTGACTCTAGACTCGCTGTCTTTTC                                                        |                                                                                  |
|                           |                          | 2832out-f                        | CAATGCCGAGGAACAACC                                                               | Primers used for verification                                                    |
|                           |                          | 2832out-r                        | GAGAAATGTTGGCAGTTC                                                               |                                                                                  |
| SMc00646 ( <i>rpoH1</i> ) | RpoH1-Sal1-forward       | CGCACAGTCGACTAACGAGCCATCTTCGCCTC | Primers used to amplify a region of SMc00646 CDS, flanked with Sall & XbaI sites |                                                                                  |
|                           | RpoH1-Xba1-Reverse       | CGAAGATCTAGAGCTCAGATCGTTCAGAACC  |                                                                                  |                                                                                  |
|                           | RpoH1-up                 | AAGCGGTATCAGGAG                  | Primers used for verification                                                    |                                                                                  |
|                           | RpoH1-down               | CCTCTGCACCTTTT                   |                                                                                  |                                                                                  |

## PRIMERS (cont.)

|                      | Targeted gene               | Primer name | Sequence                          | Description                                                 |
|----------------------|-----------------------------|-------------|-----------------------------------|-------------------------------------------------------------|
| Deletion mutants     | SMc02829<br>( <i>yejF</i> ) | 2829fup     | GCAACGGCACCATCATGGATCCGCACC       | Up fragment used for deletion of <i>SMc02829</i>            |
|                      |                             | 2829rup     | GGAGAAACTCGGAACGCTTTCTCG          |                                                             |
|                      |                             | 2829fdown   | CGTTCCGAGTTTCTCCATGC              | Down fragment used for deletion of <i>SMc02829</i>          |
|                      |                             | 2829rdown   | CACCACTCGCTCATCCAAGCTTTCAGG       |                                                             |
|                      | SMc02830<br>( <i>yejE</i> ) | 2830fup     | GGACACGTGTTCCGCAACGGATCCCTGATC    | Up fragment used for deletion of <i>SMc02830</i>            |
|                      |                             | 2830rup     | CGTCGCGCCAGACGTCCTCCG             |                                                             |
|                      |                             | 2830fdown   | GGACGTCTGGCGCGACGATGACAG          | Down fragment used for deletion of <i>SMc02830</i>          |
|                      |                             | 2830rdown   | GCGAACATGCCTGAAAGCTTCGTCTG        |                                                             |
|                      | SMc02832<br>( <i>yejA</i> ) | 2832fup     | GGTCGAACCGCAGGGATCCAGCGCAGCACG    | Up fragment used for deletion of <i>SMc02832</i>            |
|                      |                             | 2832rup     | GCAAGAGCTCCGGCCGGTACCCC           |                                                             |
|                      |                             | 2832fdown   | CGGCCGGAGCTCTTGCCTCAGG            | Down fragment used for deletion of <i>SMc02832</i>          |
|                      |                             | 2832rdown   | CATGATGCCGACGATCGTCAAGCTTATCAGC   |                                                             |
| comple-<br>mentation | <i>yejABEF</i>              | yejA_Ndel_F | ATTATAATCATATGCCAAACTTCTGCAGGACCG | upstream primer for cloning of <i>yejABEF</i> in pSRK(Gm)   |
|                      |                             | yejF_XbaI_R | ATAATTACTAGACTACTGATGAACGGCGGC    | downstream primer for cloning of <i>yejABEF</i> in pSRK(Gm) |
|                      |                             | Lacl_F      | ACGACAGGTTTCCCGACTGG              | primer for construct verification in pSRK(Gm)               |
|                      |                             | T7_F        | TAATACGACTCACTATAGGG              | primer for construct verification in pSRK(Gm)               |

## References

- Gully D, Gargani D, Bonaldi K, Grangeteau C, Chaintreuil C, Fardoux J, Nguyen P, Marchetti R, Nouwen N, Molinaro A, Mergaert P, Giraud E. 2016. A peptidoglycan-remodeling enzyme is critical for bacteroid differentiation in *Bradyrhizobium* spp. during legume symbiosis. *Mol Plant-Microbe Interact* 29:447–457.
- Khan SR, Gaines J, Roop RM 2nd, Farrand SK. 2008. Broad-host-range expression vectors with tightly regulated promoters and their use to examine the influence of TraR and TraM expression on Ti plasmid quorum sensing. *Appl Environ Microbiol* 74:5053-5062.
- Haag AF, Baloban M, Sani M, Kerscher B, Pierre O, Farkas A, Longhi R, Boncompagni E, Hérouart D, Dall'angelo S, Kondorosi E, Zanda M, Mergaert P, Ferguson GP. 2011. Protection of *Sinorhizobium* against host cysteine-rich antimicrobial peptides is critical for symbiosis. *PLoS Biol* 9:e1001169.
- Campbell GRO, Sharypova LA, Scheidle H, Jones KM, Niehaus K, Becker A, Walker GC. 2003. Striking complexity of lipopolysaccharide defects in a collection of *Sinorhizobium meliloti* mutants. *J Bacteriol* 185:3853–3862.
- Haag AF, Wehmeier S, Beck S, Marlow VL, Fletcher V, James EK, Ferguson GP. 2009. The *Sinorhizobium meliloti* LpxXL and AcpXL proteins play important roles in bacteroid development within alfalfa. *J Bacteriol* 191:4681–4686.
