# Supplementary material for: Sinorhizobium meliloti Functions Required for Resistance to Antimicrobial NCR Peptides and Bacteroid Differentiation
Source: PubMed Central journal article supplement (PMC8406287; doi:10.1128/mbio.00895-21), 2021-07-27
Supplement: mbio.00895-21-st002.pdf [file mbio.00895-21-st002.pdf]

**Table S2. Survival after NCR treatment of wild-type and mutant *Sinorhizobium meliloti* .**

| peptide<br>(concentration)        | survival (%)<br>relative to<br>untreated<br>bacteria<br>(n=3) | Standard<br>deviation | survival<br>relative to<br>WT (%) | p-value<br>(Dunn test) |
|-----------------------------------|---------------------------------------------------------------|-----------------------|-----------------------------------|------------------------|
| <b>NCR169 (10 µM)</b>             |                                                               |                       |                                   |                        |
| WT                                | 8,73                                                          | 3,41                  | 100,00                            |                        |
| <i>bacA</i>                       | 4,80                                                          | 4,43                  | 55,00                             | 0,05                   |
| <i>yejA</i>                       | 10,91                                                         | 8,52                  | 125,00                            | 0,30                   |
| <i>yejE</i>                       | 9,45                                                          | 1,70                  | 108,33                            | 0,26                   |
| <i>yejF</i>                       | 13,67                                                         | 8,86                  | 156,67                            | 0,23                   |
| <i>lpxXL</i>                      | 1,02                                                          | 0,34                  | 11,67                             | 0,02                   |
| <i>lpsB</i>                       | 6,55                                                          | 1,70                  | 75,00                             | 0,48                   |
| <i>rpoH</i>                       | 7,56                                                          | 0,68                  | 86,67                             | 0,23                   |
| <b>NCR183 (10 µM)</b>             |                                                               |                       |                                   |                        |
| WT                                | 0,05                                                          | 0,03                  | 100,00                            |                        |
| <i>bacA</i>                       | 0,01                                                          | 0,01                  | 12,50                             | 0,24                   |
| <i>yejA</i>                       | 0,13                                                          | 0,11                  | 275,00                            | 0,27                   |
| <i>yejE</i>                       | 0,00                                                          | 0,00                  | 0,00                              | 0,02                   |
| <i>yejF</i>                       | 0,00                                                          | 0,00                  | 0,00                              | 0,02                   |
| <i>lpxXL</i>                      | 0,00                                                          | 0,00                  | 0,00                              | 0,02                   |
| <i>lpsB</i>                       | 0,00                                                          | 0,01                  | 5,00                              | 0,12                   |
| <i>rpoH</i>                       | 0,23                                                          | 0,15                  | 487,50                            | 0,15                   |
| <b>NCR247 (25 µM)</b>             |                                                               |                       |                                   |                        |
| WT                                | 0,03                                                          | 0,02                  | 100,00                            |                        |
| <i>bacA</i>                       | 0,00                                                          | 0,00                  | 3,85                              | 0,08                   |
| <i>yejA</i>                       | 0,05                                                          | 0,00                  | 153,85                            | 0,37                   |
| <i>yejE</i>                       | 0,00                                                          | 0,00                  | 3,85                              | 0,03                   |
| <i>yejF</i>                       | 0,00                                                          | 0,00                  | 0,00                              | 0,01                   |
| <i>lpxXL</i>                      | 0,00                                                          | 0,00                  | 0,00                              | 0,01                   |
| <i>lpsB</i>                       | 0,00                                                          | 0,00                  | 0,00                              | 0,01                   |
| <i>rpoH</i>                       | 0,00                                                          | 0,00                  | 0,00                              | 0,01                   |
| <b>NCR280 (25 µM)</b>             |                                                               |                       |                                   |                        |
| WT                                | 0,05                                                          | 0,01                  | 100,00                            |                        |
| <i>bacA</i>                       | 0,01                                                          | 0,02                  | 23,91                             | 0,23                   |
| <i>yejA</i>                       | 0,00                                                          | 0,00                  | 2,17                              | 0,02                   |
| <i>yejE</i>                       | 0,00                                                          | 0,00                  | 0,00                              | 0,01                   |
| <i>yejF</i>                       | 0,01                                                          | 0,01                  | 10,87                             | 0,14                   |
| <i>lpxXL</i>                      | 0,00                                                          | 0,00                  | 0,00                              | 0,01                   |
| <i>lpsB</i>                       | 0,00                                                          | 0,00                  | 0,00                              | 0,01                   |
| <i>rpoH</i>                       | 0,07                                                          | 0,02                  | 134,78                            | 0,29                   |
| <b>NCR247 (25 µM)</b>             |                                                               |                       |                                   |                        |
| WT.pSRK-Gm                        | 0,16                                                          | 0,04                  | 100,00                            |                        |
| <i>yejF</i> .pSRK-Gm              | 0,00                                                          | 0,00                  | 0,12                              | 0,01                   |
| WT.pSRK- <i>yejABEF</i>           | 0,14                                                          | 0,04                  | 87,99                             | 0,36                   |
| <i>yejF</i> .pSRK- <i>yejABEF</i> | 0,19                                                          | 0,08                  | 117,20                            | 0,36                   |
